# Supplementary material for: Diverted from Landfill: Reuse of Single-Use Plastic Packaging Waste
Source: MDPI journal article supplement (doi:10.3390/polym14245485), 2022-12-15
Supplement: s1 [file s1]

## Supplementary document

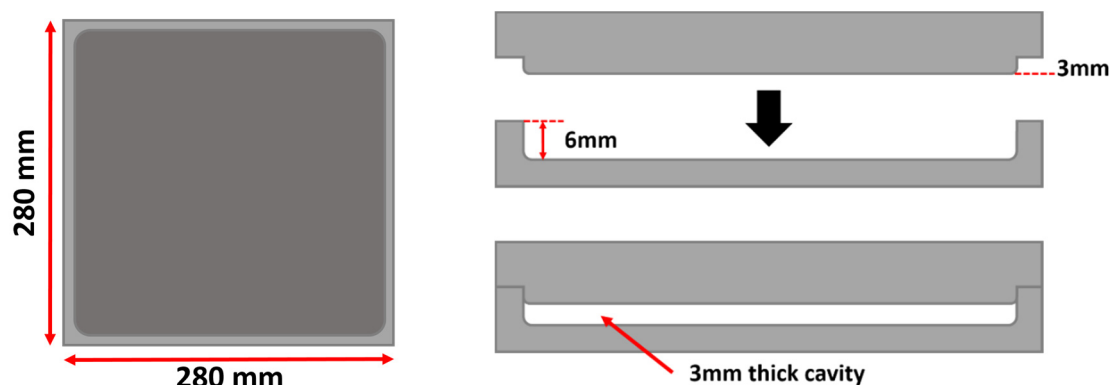

Figure S1: Closed two-part metal mould used to manufacture plastic plaques in hydraulic press.

Table S1: Typical melting ranges of polyolefin materials [1-5].

| Material                        | Melting range (°C)        |
|---------------------------------|---------------------------|
| Low Density Polyethylene        | 105 – 123                 |
| Linear Low Density Polyethylene | 120 – 127                 |
| High Density Polyethylene       | 122 – 137                 |
| Polypropylene                   | 160 – 170                 |
| Waste Mixed Plastics            | 105 – 140 (+165 for rPP*) |

\*1 out of 5 wMP samples showed a peak at 165 °C

Table S2: Crystallinity of wMP and segregated recycled thermoplastics calculated from DSC analysis.

| Sample   | Crystallinity (%) | Average Crystallinity (%) |
|----------|-------------------|---------------------------|
| wMP 1    | 40.6              | 40.4                      |
| wMP 2    | 40.3              |                           |
| wMP 3    | 40.3              |                           |
| rLDPE 1  | 38.9              | 39.1                      |
| rLDPE 2  | 39.2              |                           |
| rLLDPE 1 | 38.6              | 36.7                      |
| rLLDPE 2 | 34.8              |                           |
| rHDPE 1  | 75.1              | 76.8                      |
| rHDPE 2  | 78.5              |                           |
| rPP 1    | 51.2              | 54.1                      |
| rPP 2    | 57.0              |                           |

|         |      |      |
|---------|------|------|
| vLDPE 1 | 37.9 | 38.6 |
| vLDPE 2 | 39.2 |      |

Table S3: Onset and endset temperatures for thermal degradation of wMP and recycled plastics.

| Sample | Degradation Onset (°C) | Degradation Endset (°C) |
|--------|------------------------|-------------------------|
| wMP    | 350                    | 485                     |
| rLDPE  | 390                    | 487                     |
| rLLDPE | 380                    | 495                     |
| rHDPE  | 410                    | 490                     |
| rPP    | 380                    | 475                     |
| vLDPE  | 400                    | 485                     |

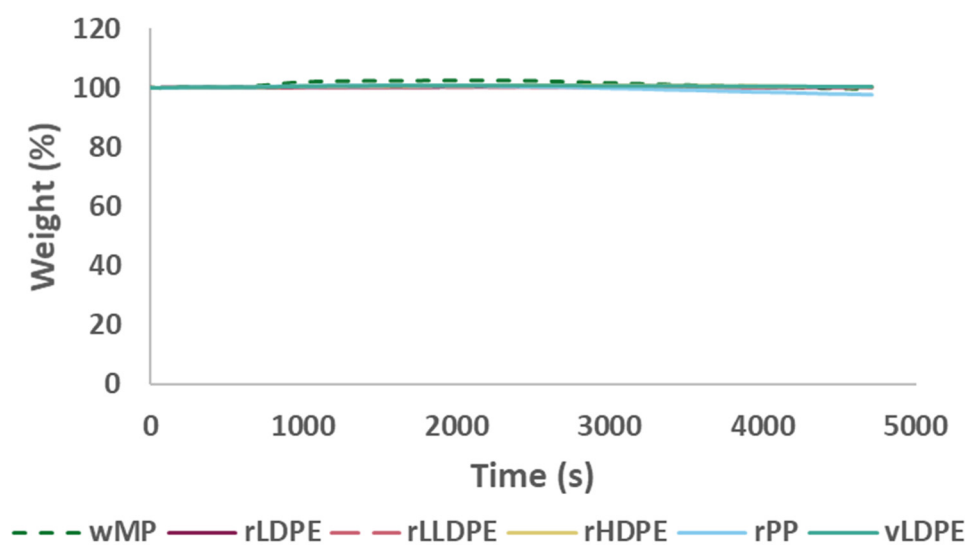

Figure S2: Change in weight of the samples after holding at 200 °C for 1 hour in air.

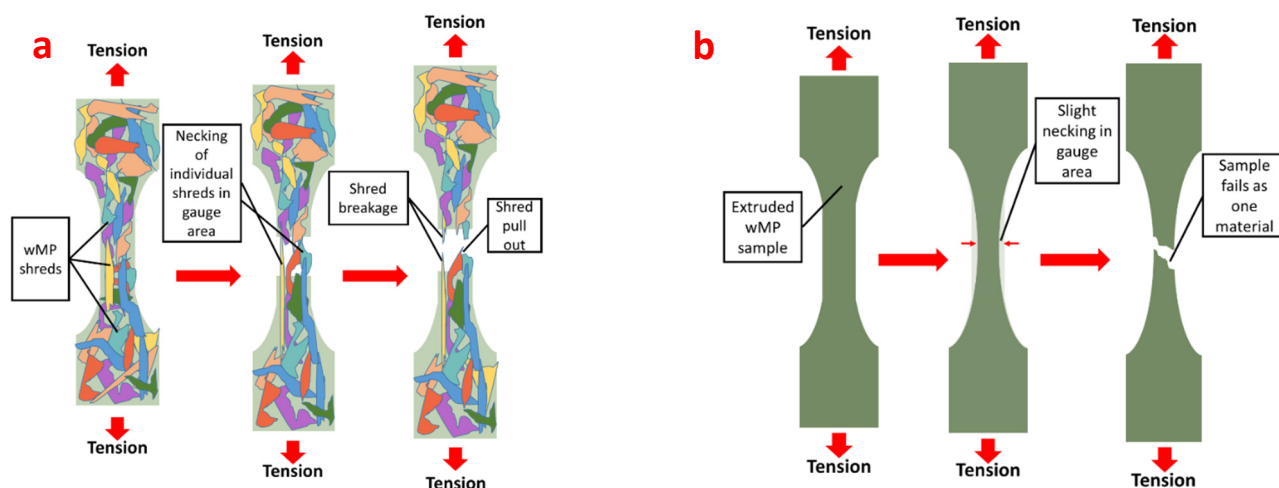

Figure S3: Schematic showing the failure behaviour in (a) wMP-2 and (b) wMP-2-ex during tensile testing.

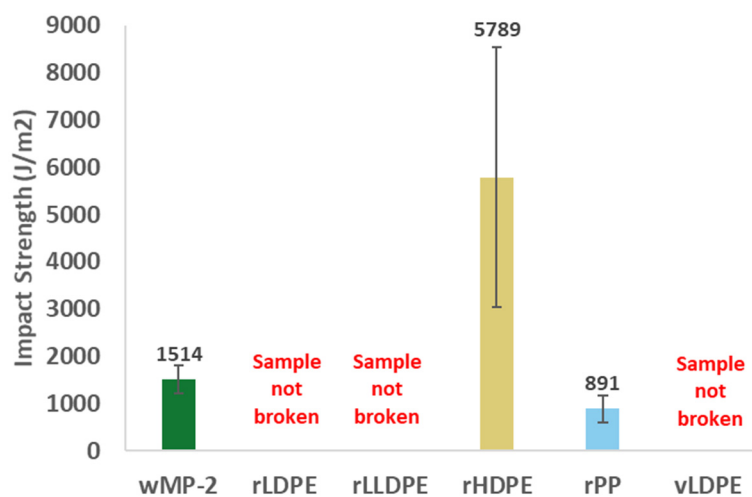

Figure S4: Izod impact strength (un-notched) of wMP-2 in comparison to recycled plastics (rPP and rHDPE).

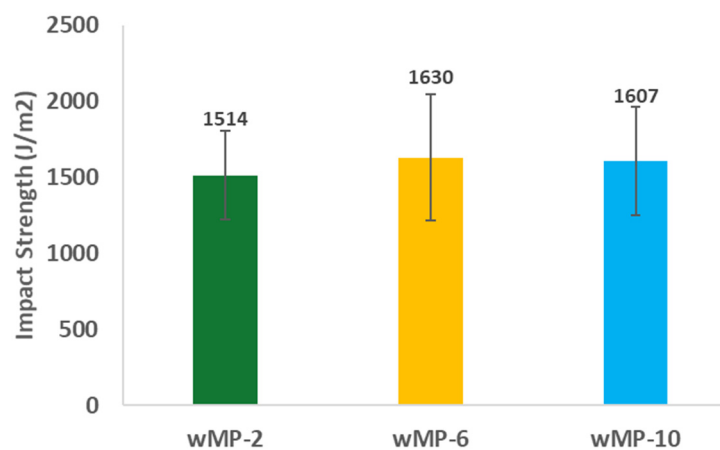

Figure S5: Comparison of Izod impact strength (un-notched) of wMP manufactured under different pressures.

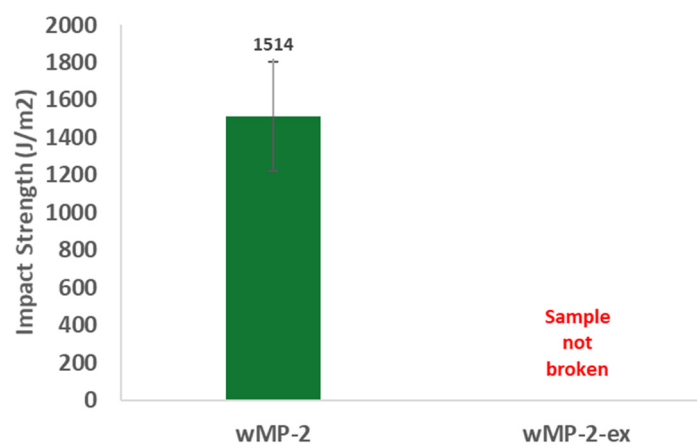

Figure S6: Comparison of Izod impact strength (un-notched) of wMP samples produced by compression moulding of wMP shreds and by compression moulding of an extruded block of wMP.

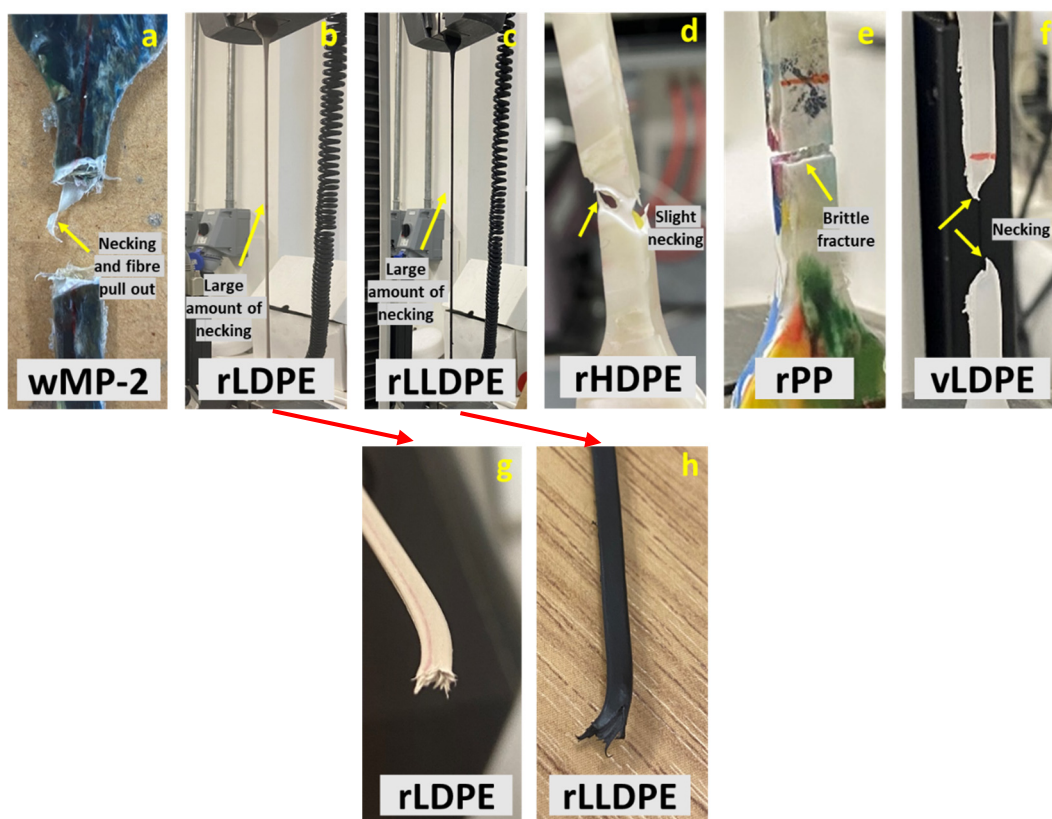

Figure S7: Representative tensile test specimens of (a) wMP-2, (b) rLDPE, (c) rLLDPE, (d) rHDPE, (e) rPP and (f) vLDPE during tensile testing with additional close up images of (g) rLDPE and (h) rLLDPE, due to the high amount of stretching.

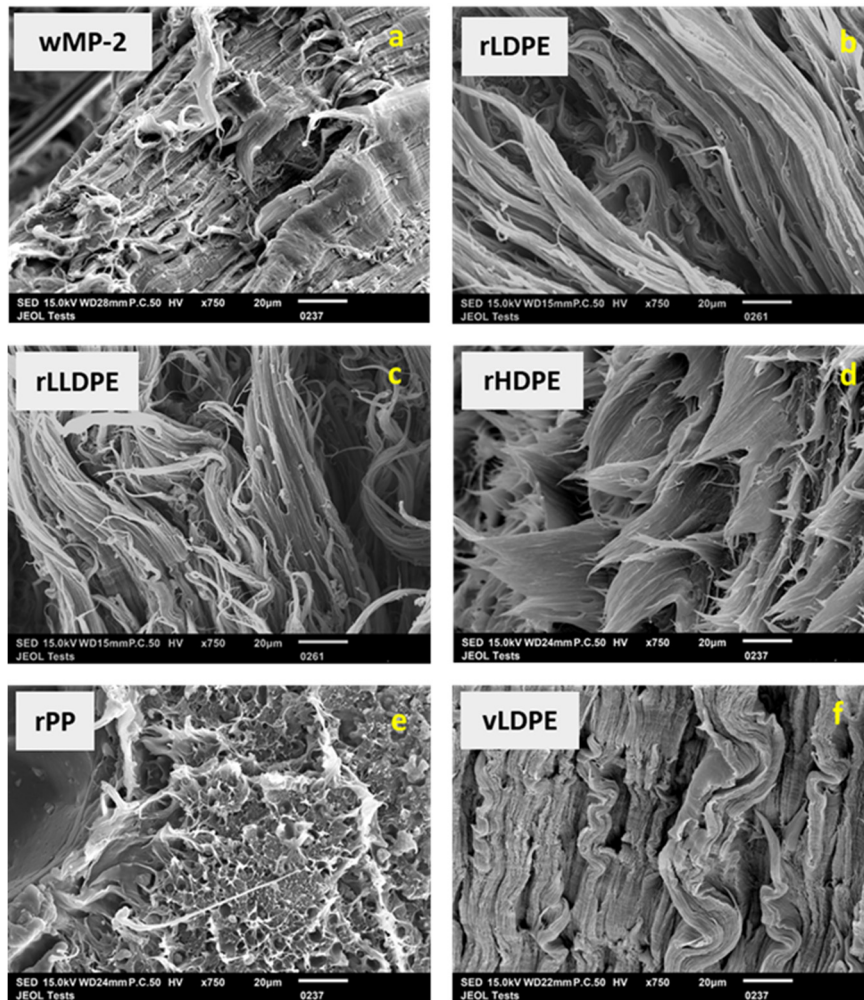

Figure S8: SEM images of the fracture surface of tested tensile specimens at x750 magnification.

1. Selke, S.E. and R.J. Hernandez, *Packaging: Polymers for Containers*, in *Encyclopedia of Materials: Science and Technology*, K.H.J. Buschow, et al., Editors. 2001, Elsevier: Oxford. p. 6646-6652.
2. Jin, H., et al., *The effect of extensive mechanical recycling on the properties of low density polyethylene*. *Polymer Degradation and Stability*, 2012. **97**(11): p. 2262–2272.
3. Jordan, J., et al., *Mechanical Properties of Low Density Polyethylene*. *Journal of Dynamic Behavior of Materials*, 2016. **2**.

4. Mohammadi, H., M. Vincent, and H. Marand, *Investigating the equilibrium melting temperature of linear polyethylene using the non-linear Hoffman-Weeks approach*. *Polymer*, 2018. **146**: p. 344-360.
5. Menyhárd, A., J.D. Menczel, and T. Abraham, *12 - Polypropylene fibers*, in *Thermal Analysis of Textiles and Fibers*, M. Jaffe and J.D. Menczel, Editors. 2020, Woodhead Publishing. p. 205-222.
